# Supplementary material for: Controlled potential electrodeposition of a microcrystalline thin film of the charge transfer material tetrathiafulvalene–polyoxometalate of approximate composition (TTF)5.3(Bu4N)0.7[P2W18O62]·3H2O
Source: Royal Society of Chemistry journal article supplement (doi:10.1039/c0jm03011b), 2011-01-01
Supplement: c0jm03011b.pdf [file c0jm03011b.pdf]

## Supplementary Information

### Controlled Potential Electrodeposition of a Microcrystalline Thin Film of The Charge Transfer Material Tetrathiafulvalene-Polyoxometalate of approximate composition $(\text{TTF})_{5.3}(\text{Bu}_4\text{N})_{0.7}[\text{P}_2\text{W}_{18}\text{O}_{62}] \cdot 3\text{H}_2\text{O}$

*Qi Li, Chuan Zhao, Alan M. Bond,\* John F. Boas, Anthony G. Wedd, Boujemaa Moubaraki and Keith S. Murray*

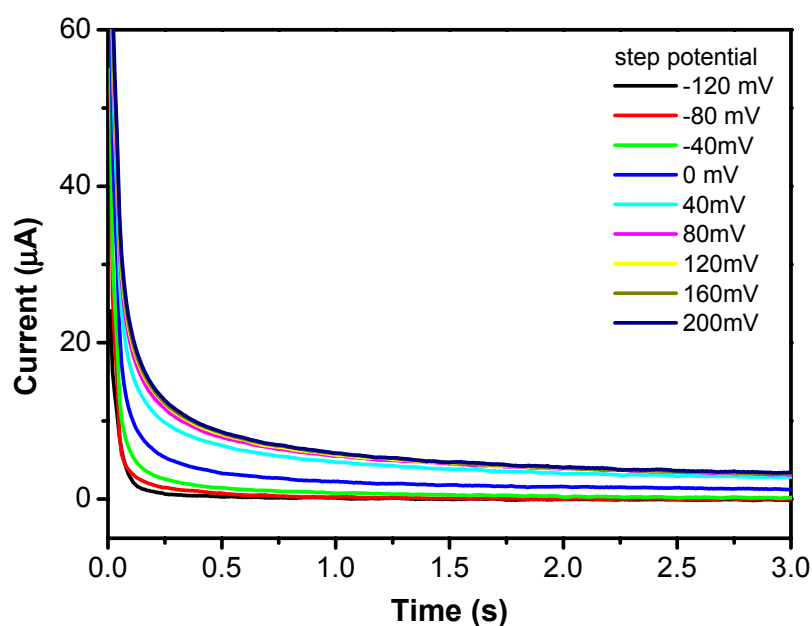

**Figure S1.** Chronoamperometric (*i-t*) transients obtained at a 3 mm GC electrode in acetonitrile (0.1 M  $[\text{Bu}_4\text{N}][\text{PF}_6]$ ) for a mixture of TTF (0.3 mM) and  $\text{K}_6\text{P}_2\text{W}_{18}\text{O}_{62}$  (0.1 mM) when the potential was stepped from an initial value (-0.5 V) to more positive potentials (-0.12 to 0.2 V with 40 mV increments).

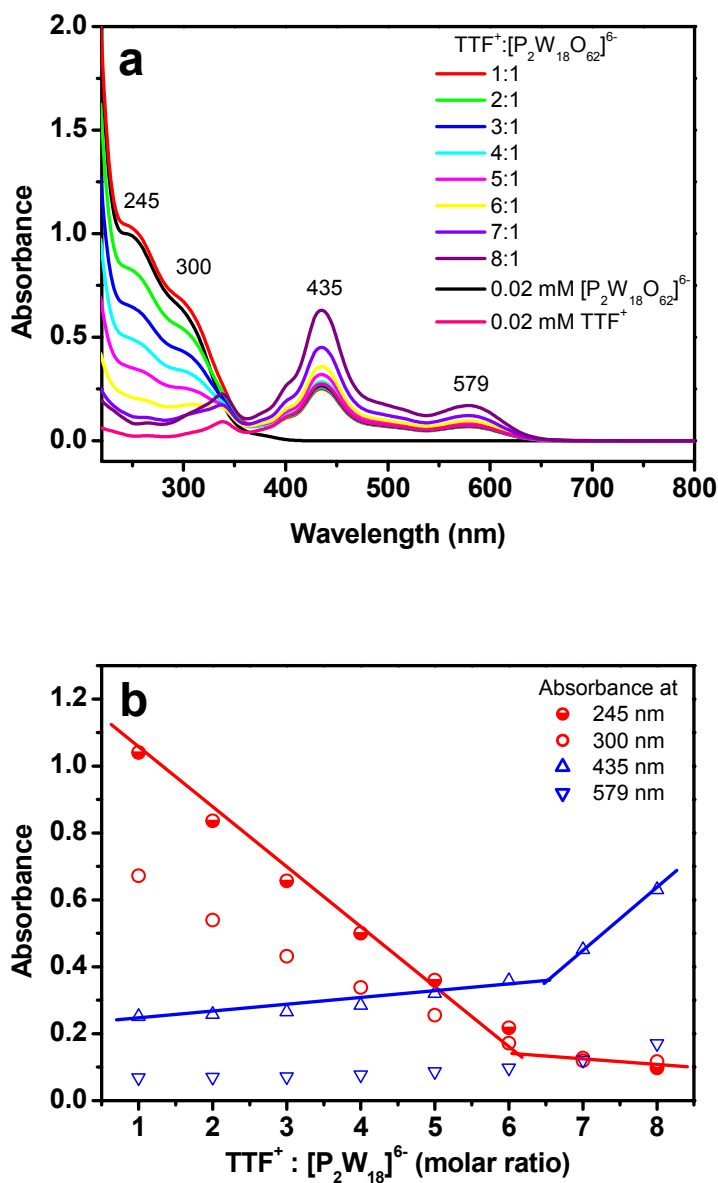

**Figure S2.** The UV-vis spectra (a) of the supernatants obtained from the addition of 2 mL [TTF][PF<sub>6</sub>] in MeCN (0.1 M [Bu<sub>4</sub>N][PF<sub>6</sub>]) with varied concentrations (0.2, 0.4, 0.6, 0.8, 1.0, 1.2, 1.4, 1.6 mM) to 2 mL MeCN solution of 0.2 mM [P<sub>2</sub>W<sub>18</sub>O<sub>62</sub>]<sup>6-</sup> anion. The supernatants were collected 10 min after the addition of [TTF][PF<sub>6</sub>], followed by five-fold dilution before the measurements. The absorptions at

characteristic wavelengths were plotted (b) as a function of the molar ratio of TTF<sup>+</sup> to [P<sub>2</sub>W<sub>18</sub>O<sub>62</sub>]<sup>6-</sup>. Fitted lines were shown to guide the eyes.

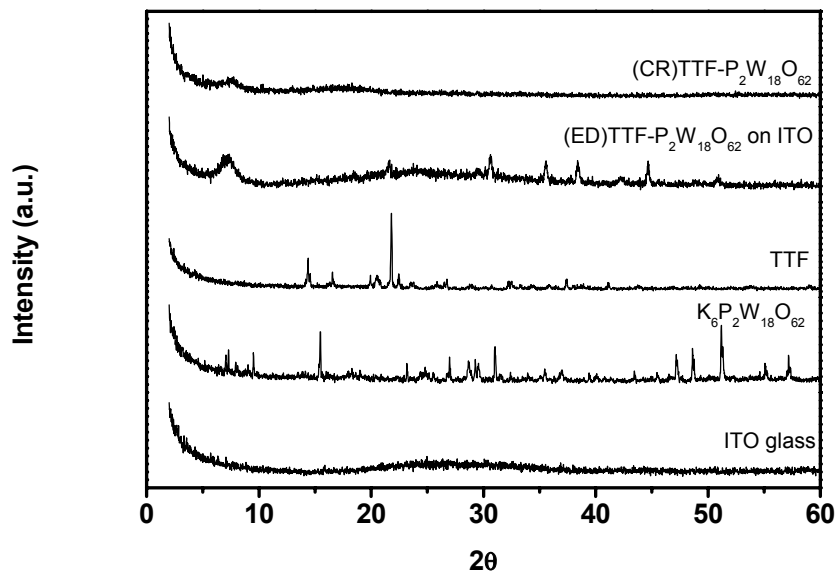

**Figure S3.** X-ray powder diffraction patterns of TTF-P<sub>2</sub>W<sub>18</sub>O<sub>62</sub> material produced chemically ((CR)TTF-P<sub>2</sub>W<sub>18</sub>O<sub>62</sub>) or by electrodeposition ((ED)TTF-P<sub>2</sub>W<sub>18</sub>O<sub>62</sub>) on ITO glass, compared to XRD of TTF, K<sub>6</sub>P<sub>2</sub>W<sub>18</sub>O<sub>62</sub> and bare ITO glass.
